# Supplementary material for: Cross-Sensory EEG Emotion Recognition with Filter Bank Riemannian Feature and Adversarial Domain Adaptation
Source: MDPI journal article supplement (doi:10.3390/brainsci13091326), 2023-09-14
Supplement: s1 [file s1]

**Supplementary material:****Table S1.** Table of abbreviations, full names and usages.

| Abbreviation | Full name                                                                                   | Usage                                                                        |
|--------------|---------------------------------------------------------------------------------------------|------------------------------------------------------------------------------|
| EEG          | Electroencephalography                                                                      | Technical term                                                               |
| FBADR        | Filter banks adversarial domain adaptation Riemann method                                   | Name of proposed method                                                      |
| SNR          | Signal-to-noise ratio                                                                       | Technical term                                                               |
| a-BCI        | Affective brain-computer interface                                                          | Technical term                                                               |
| FLD3QN       | Frontal Lobe Double Dueling Deep Q Network                                                  | Related work introduced in the introduction                                  |
| TC-Net       | Transformer Capsule Network                                                                 | Related work introduced in the introduction                                  |
| Bi-LSTM      | Bi-directional Long Short-Term Memory                                                       | Related work introduced in the introduction                                  |
| GFIL         | Graph-regularized least square regression with feature importance learning                  | Related work introduced in the introduction                                  |
| PCC-CNN      | Pearson's Correlation Coefficient feature with Convolutional Neural Network                 | Related work introduced in the introduction and used in baseline comparison. |
| SVM          | Support vector machine                                                                      | Technical term                                                               |
| ICRM-LSTM    | Independent component analysis with Riemannian manifold and long short-term memory networks | Related work introduced in the introduction and used in baseline comparison. |
| ICA          | Independent component analysis                                                              | Technical term                                                               |
| daSPDnet     | domain-adaptation symmetric positive definite (SPD) matrix network                          | Related works introduced in the introduction                                 |
| SPD          | Symmetric positive define                                                                   | Technical term                                                               |
| HMD          | Head-mounted displays                                                                       | Technical term                                                               |
| MED4         | Multimodal emotion database                                                                 | Related work introduced in the introduction                                  |
| GSR          | Galvanic skin response                                                                      | Technical term                                                               |
| SOGNN        | Self-organized graph neural network                                                         | Related work introduced in the introduction                                  |
| CLISA        | Contrastive Learning method for Inter-Subject Alignment                                     | Related work introduced in the introduction                                  |
| FIR          | Finite impulse response                                                                     | Technical term                                                               |
| CM           | Covariance matrix                                                                           | Technical term                                                               |
| TS           | Tangent space                                                                               | Technical term                                                               |
| GANs         | Generative adversarial networks                                                             | Technical term                                                               |
| LR           | Logistic regression                                                                         | Technical term                                                               |
| RIE          | Riemannian method                                                                           | Relative model used in model self-comparison                                 |
| ADR          | Adversarial domain Riemannian method                                                        | Relative model used in model self-comparison                                 |

|         |                                                                                                                                                                                                                                                                           |                                                                              |
|---------|---------------------------------------------------------------------------------------------------------------------------------------------------------------------------------------------------------------------------------------------------------------------------|------------------------------------------------------------------------------|
| FBR     | Filter bank Riemannian method                                                                                                                                                                                                                                             | Relative model used in model self-comparison                                 |
| TP      | True positive                                                                                                                                                                                                                                                             | Technical term                                                               |
| TN      | True negative                                                                                                                                                                                                                                                             | Technical term                                                               |
| FP      | False positive                                                                                                                                                                                                                                                            | Technical term                                                               |
| FN      | False negative                                                                                                                                                                                                                                                            | Technical term                                                               |
| ANOVA   | Analysis of variance                                                                                                                                                                                                                                                      | Technical term                                                               |
| RBF     | Radial basis function                                                                                                                                                                                                                                                     | Kernel of Support Vector Machine                                             |
| KNN     | K-nearest neighbor                                                                                                                                                                                                                                                        | Related work used in baseline comparison.                                    |
| EEGNET  | An end-to-end EEG decoding framework based on neural networks                                                                                                                                                                                                             | Related work used in baseline comparison.                                    |
| PCC-CNN | EEG Emotion recognition framework with Pearson's Correlation Coefficient (PCC) featured images of channel correlation of EEG sub-bands and CNN model to recognize emotion                                                                                                 | Related work introduced in the introduction and used in baseline comparison. |
| DANN    | A transfer learning-based EEG emotion recognition framework with adversarial domain adaptation neural networks.                                                                                                                                                           | Related work used in the baseline comparison.                                |
| WG-DANN | A transfer learning-based EEG emotion recognition framework consists of GANs-like components and a two-step training procedure with pre-training and adversarial training with Wasserstein GAN gradient penalty loss for cross-subject EEG emotion recognition framework. | Related work used in the baseline comparison.                                |
